# Supplementary material for: BNP level predicts bleeding event in patients with heart failure after percutaneous coronary intervention
Source: HighWire-hosted journal article supplement (doi:10.1136/openhrt-2023-002489), 2023-12-01
Supplement: openhrt-2023-002489supp001_data_supplement.pdf [file openhrt-2023-002489supp001_data_supplement.pdf]

## **Supplement for BNP Level Predicts Major Bleeding Events in Patients with Heart Failure After Percutaneous Coronary Intervention**

Otsuka Y, et al.

### **CONTENTS**

**Supplementary Figure 1.** Study flowchart of CLIDAS

**Supplementary Figure 2.** Study flowchart of T-TAS

**Supplemental Figure 3.** Kaplan–Meier estimates of bleeding events (GUSTO severe/moderate) between the HF and non-HF groups

**Supplemental Table.1** Baseline patient characteristics

**Supplemental Table 2.** Types of bleeding events during 3-year follow-up in patients with and without HF

**Supplementary Table 3.** Types of bleeding events during 3-year follow-up according to severity of HF

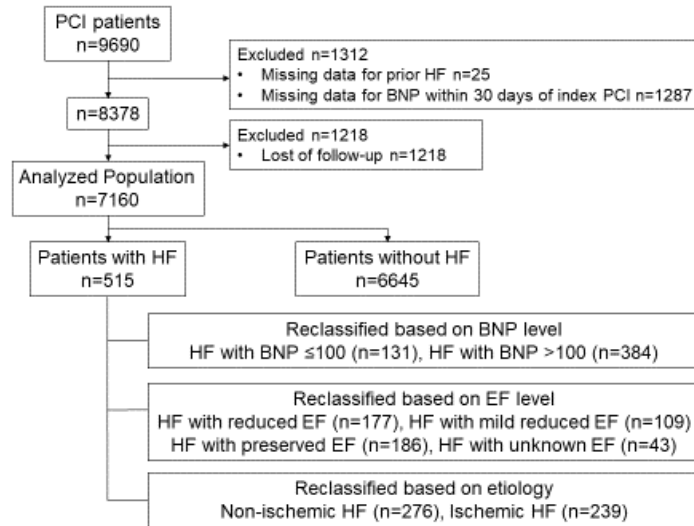

### Supplemental Figure 1. Study flowchart of CLIDAS.

CLIDAS, Clinical Deep Data Accumulation System; PCI, percutaneous coronary intervention; HF, heart failure; EF, ejection fraction

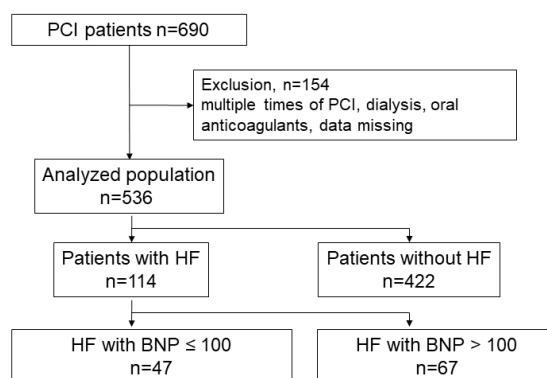

### Supplemental Figure 2. Study flowchart of T-TAS

T-TAS, Total Thrombus-Formation Analysis System; HF, heart failure; BNP, B-type natriuretic peptide

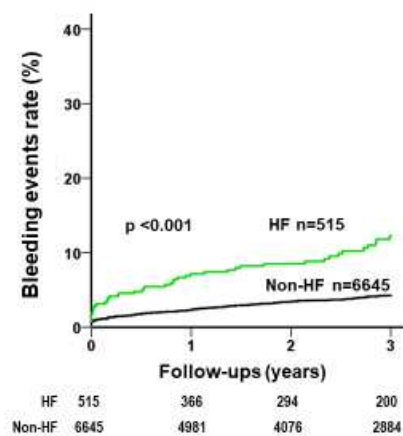

**Supplemental Figure 3. Kaplan–Meier estimates of bleeding events (GUSTO severe/moderate) between the HF and non-HF groups**

GUSTO, Global Use of Streptokinase and t-PA for Occluded Coronary Arteries; HF, heart failure;

**Supplemental Table.1 Baseline patient characteristics**

|                           | Patients without HF<br>N = 6,645 | Patients with HF<br>N = 515 | p-value |
|---------------------------|----------------------------------|-----------------------------|---------|
| Age                       | 71 (64, 78)                      | 75 (66, 80)                 | <0.001  |
| Male                      | 5,183 (78%)                      | 367 (71%)                   | <0.001  |
| BMI                       | 23.9 (21.8, 26.3)                | 23.1 (20.6, 25.6)           | <0.001  |
| SBP at discharge          | 118 (106, 130)                   | 115 (100, 128)              | <0.001  |
| DBP at discharge          | 64 (58, 72)                      | 60 (54, 68)                 | <0.001  |
| PR at discharge           | 67 (60, 75)                      | 70 (62, 78)                 | <0.001  |
| ACS                       | 3,086 (46%)                      | 143 (28%)                   | <0.001  |
| Hypertension              | 5,508 (83%)                      | 457 (89%)                   | <0.001  |
| Dyslipidemia              | 5,224 (79%)                      | 383 (74%)                   | 0.02    |
| Diabetes                  | 2,806 (42%)                      | 294 (57%)                   | <0.001  |
| Smoking                   | 1,367 (21%)                      | 91 (18%)                    | 0.24    |
| missing data              | 3,056 (46%)                      | 241 (47%)                   |         |
| CKD (eGFR <60)            | 2,917 (47%)                      | 379 (76%)                   | <0.001  |
| missing data              | 417 (6%)                         | 14 (3%)                     |         |
| eGFR                      | 62 (48, 74)                      | 44 (21, 60)                 | <0.001  |
| Hemodialysis              | 372 (5.6%)                       | 76 (15%)                    | <0.001  |
| Family_history_of_CVD     | 1,409 (21%)                      | 92 (18%)                    | 0.039   |
| missing data              | 1,279 (19%)                      | 91 (18%)                    |         |
| Malignancy                | 610 (9.6%)                       | 62 (13%)                    | 0.022   |
| Previous_MI               | 951 (14%)                        | 143 (28%)                   | <0.001  |
| Previous_PCI              | 1,322 (20%)                      | 161 (31%)                   | <0.001  |
| Previous_CABG             | 331 (5.0%)                       | 82 (16%)                    | <0.001  |
| Previous_Stroke           | 759 (11%)                        | 80 (16%)                    | 0.005   |
| Atrial_Fibrillation       | 272 (4.1%)                       | 68 (13%)                    | <0.001  |
| Peripheral_artery_disease | 518 (8.7%)                       | 70 (15%)                    | <0.001  |
| Culprit lesion            |                                  |                             |         |
| RCA                       | 3,386 (54%)                      | 282 (59%)                   | 0.034   |
| LAD                       | 4,567 (73%)                      | 360 (76%)                   | 0.24    |
| LCX                       | 2,733 (44%)                      | 242 (51%)                   | 0.003   |
| LMT                       | 492 (7.9%)                       | 52 (11%)                    | 0.019   |
| missing data              | 415 (6.2%)                       | 40 (7.8%)                   |         |
| MVD                       | 3,378 (51%)                      | 299 (58%)                   | 0.002   |
| BNP                       | 51 (21, 134)                     | 231 (98, 504)               | <0.001  |
| HF with BNP over 100      | 0 (0%)                           | 384 (75%)                   | <0.001  |
| EF                        | 61 (51, 67)                      | 45 (32, 56)                 | <0.001  |
| missing data              | 1,175 (18%)                      | 43 (8.3%)                   |         |
| EF category               |                                  |                             | <0.001  |
| <40                       | 532 (9.7%)                       | 177 (38%)                   |         |
| ≥50                       | 4,211 (77%)                      | 186 (39%)                   |         |
| 40-49                     | 727 (13%)                        | 109 (23%)                   |         |
| Anticoagulant             | 791 (12%)                        | 144 (28%)                   | <0.001  |
| DOAC                      | 308 (4.6%)                       | 60 (12%)                    | <0.001  |
| Warfarin                  | 501 (7.5%)                       | 87 (17%)                    | <0.001  |
| DAPT                      | 5,683 (86%)                      | 427 (83%)                   | 0.11    |
| Aspirin                   | 6,152 (93%)                      | 471 (92%)                   | 0.35    |
| P2Y12 inhibitor           | 6,047 (91%)                      | 456 (89%)                   | 0.063   |
| PPI                       | 5,456 (82%)                      | 425 (83%)                   | 0.81    |

Data are mean±SD, or n (%). Data for this parameter were measured at admission.

BMI indicates body mass index, SBP; systolic blood pressure, DBP; diastolic blood pressure, PR; pulse rate, ACS; acute coronary syndrome, CKD; chronic kidney disease, eGFR; estimated glomerular filtration rate, CVD; coronary vessel disease, MI, myocardial infarction, PCI; percutaneous coronary intervention, CABG; coronary artery bypass grafting RCA; right coronary artery, LAD; left anterior descending artery, LCX; left circumflex artery, LMT; left main trunk, MVD; multi vessel disease, BNP; B-type natriuretic peptide, EF; ejection fraction, DOAC; direct oral anticoagulants, DAPT; dual antiplatelet therapy, PPI; Proton pump inhibitor.

**Supplemental Table 2. Types of bleeding events during 3-year follow-up in patients with and without HF**

|                                                          | <b>Non-HF</b><br><b>N=6645</b> | <b>HF</b><br><b>N=515</b> | <b>p value</b> |
|----------------------------------------------------------|--------------------------------|---------------------------|----------------|
| <b>Bleeding events</b><br><b>(GUSTO severe/moderate)</b> | 227 (3.4)                      | 49 (9.5)                  | <0.001         |
| <b>ICH</b>                                               | 53 (0.8)                       | 12 (2.3)                  | 0.002          |
| <b>GI bleeding</b>                                       | 93 (1.4)                       | 23 (4.5)                  | <0.001         |
| <b>Puncture site</b>                                     | 47 (0.7)                       | 8 (1.6)                   | 0.058          |
| <b>Trauma</b>                                            | 2 (0.03)                       | 0 (0)                     | >0.99          |
| <b>Other</b>                                             | 32 (0.5)                       | 6 (1.2)                   | 0.052          |

HF indicates heart failure, ICH; intracerebral hemorrhage and GI; gastrointestinal.

**Supplemental Table 3. Types of bleeding events during 3-year follow-up according to severity of HF**

|                                                | <b>Non-HF</b><br><b>N=6645</b> | <b>HF with BNP</b><br><b>≤100</b><br><b>N=131</b> | <b>HF with BNP</b><br><b>&gt;100</b><br><b>N=384</b> | <b>p value for trend</b> |
|------------------------------------------------|--------------------------------|---------------------------------------------------|------------------------------------------------------|--------------------------|
| <b>Bleeding events (GUSTO severe/moderate)</b> |                                |                                                   |                                                      |                          |
| <b>ICH</b>                                     | 227 (3.4)                      | 9 (6.9)                                           | 40 (10.4)                                            | <0.001                   |
| <b>GI bleeding</b>                             | 53 (0.8)                       | 2 (1.5)                                           | 10 (2.6)                                             | <0.001                   |
| <b>Puncture site</b>                           | 93 (1.4)                       | 4 (3.1)                                           | 19 (4.9)                                             | <0.001                   |
| <b>Trauma</b>                                  | 47 (0.7)                       | 2 (1.5)                                           | 6 (1.6)                                              | 0.039                    |
| <b>Other</b>                                   | 2 (0.1)                        | 0 (0)                                             | 0 (0)                                                | 0.703                    |
|                                                | 32 (0.5)                       | 1 (0.8)                                           | 5 (1.3)                                              | 0.03                     |

HF indicates heart failure, BNP; B-type natriuretic peptide, ICH; intracerebral hemorrhage and GI; gastrointestinal.
